# Supplementary material for: Statin drugs enhance responses to immune checkpoint blockade in head and neck cancer models
Source: PubMed Central journal article supplement — J Immunother Cancer. 2023 Jan 17;11(1):e005940. doi: 10.1136/jitc-2022-005940 (PMC9853267; doi:10.1136/jitc-2022-005940), 2023-01-17
Supplement: jitc-2022-005940supp001.pdf [file jitc-2022-005940supp001.pdf]

## Supplemental Figures

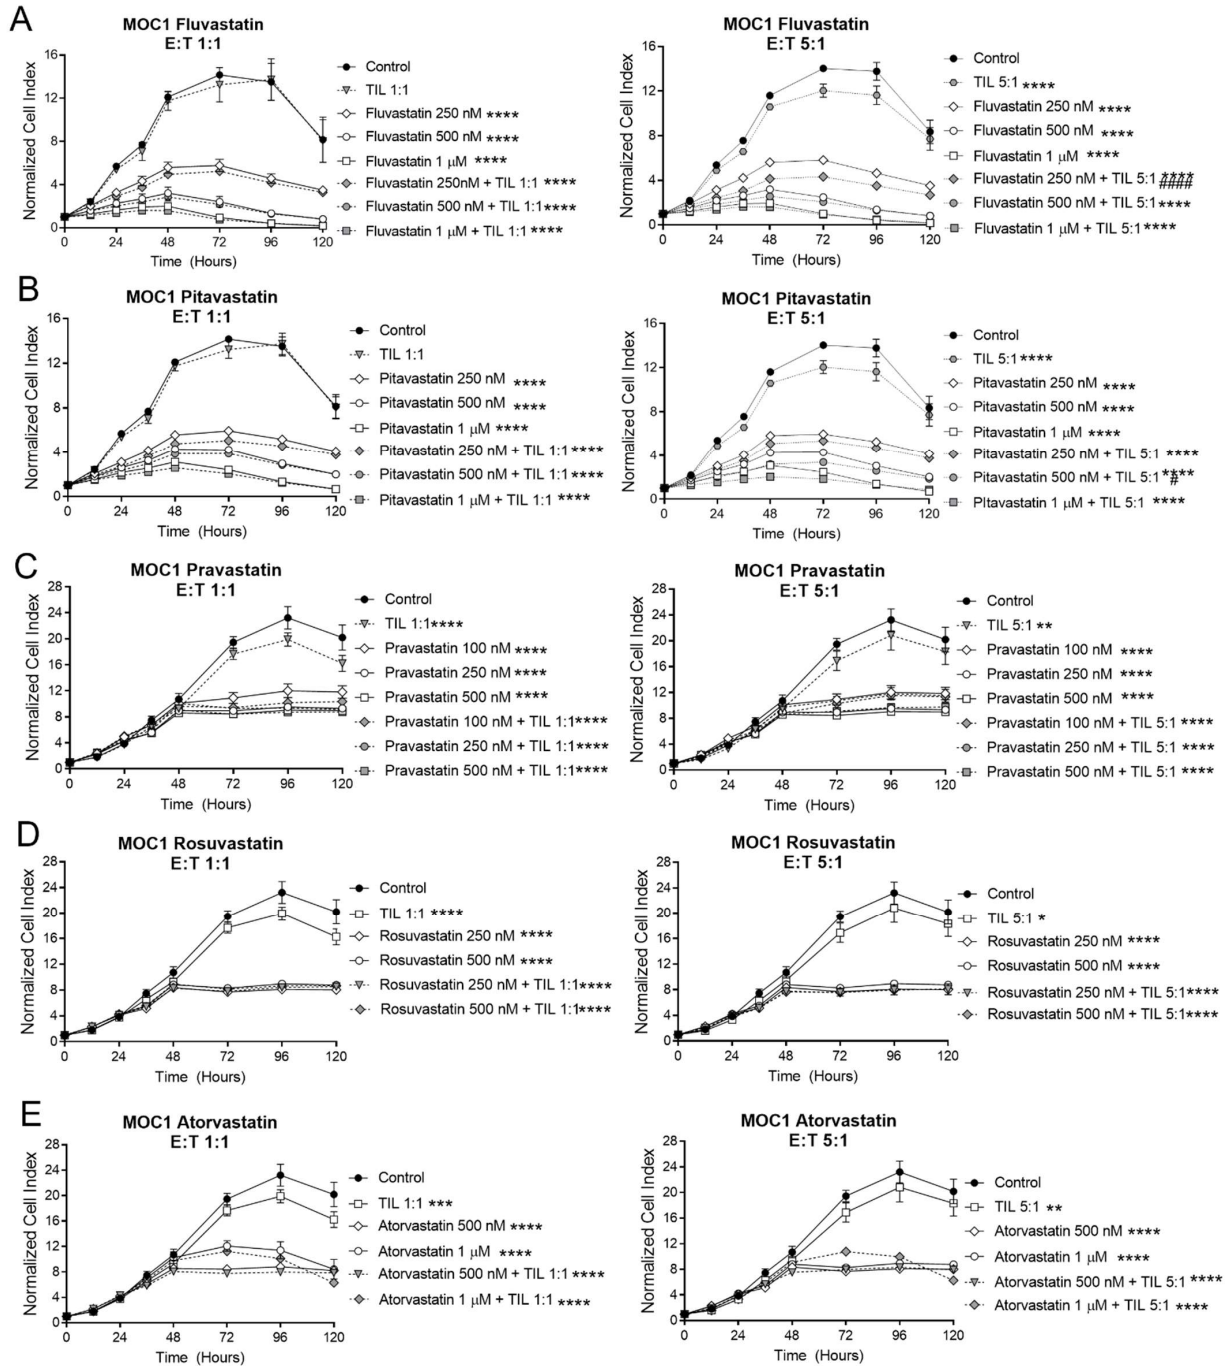

**Figure S1:** Different statins enhance direct and T-cell-induced inhibition of MOC1 tumor cell growth to variable degrees. MOC1 cells were plated in 96-well plates and allowed to adhere overnight. Some wells were then treated with statin drug and/or TIL at a 1:1 or 5:1 effector: target (E:T) ratio for 120 hours. Data represent mean  $\pm$  SEM of 4 replicates, normalized to a cell index of 1.0 when statin and/or TIL were added (time 0 on graph). Graphs are representative of at least two independent experiments done in quadruplicate. \* $p$ <0.01, \*\* $p$ <0.001, \*\*\* $p$ <0.0001 versus control; # $p$ <0.05, #### $p$ <0.0001 versus statin alone. TIL, tumor infiltrating lymphocytes.

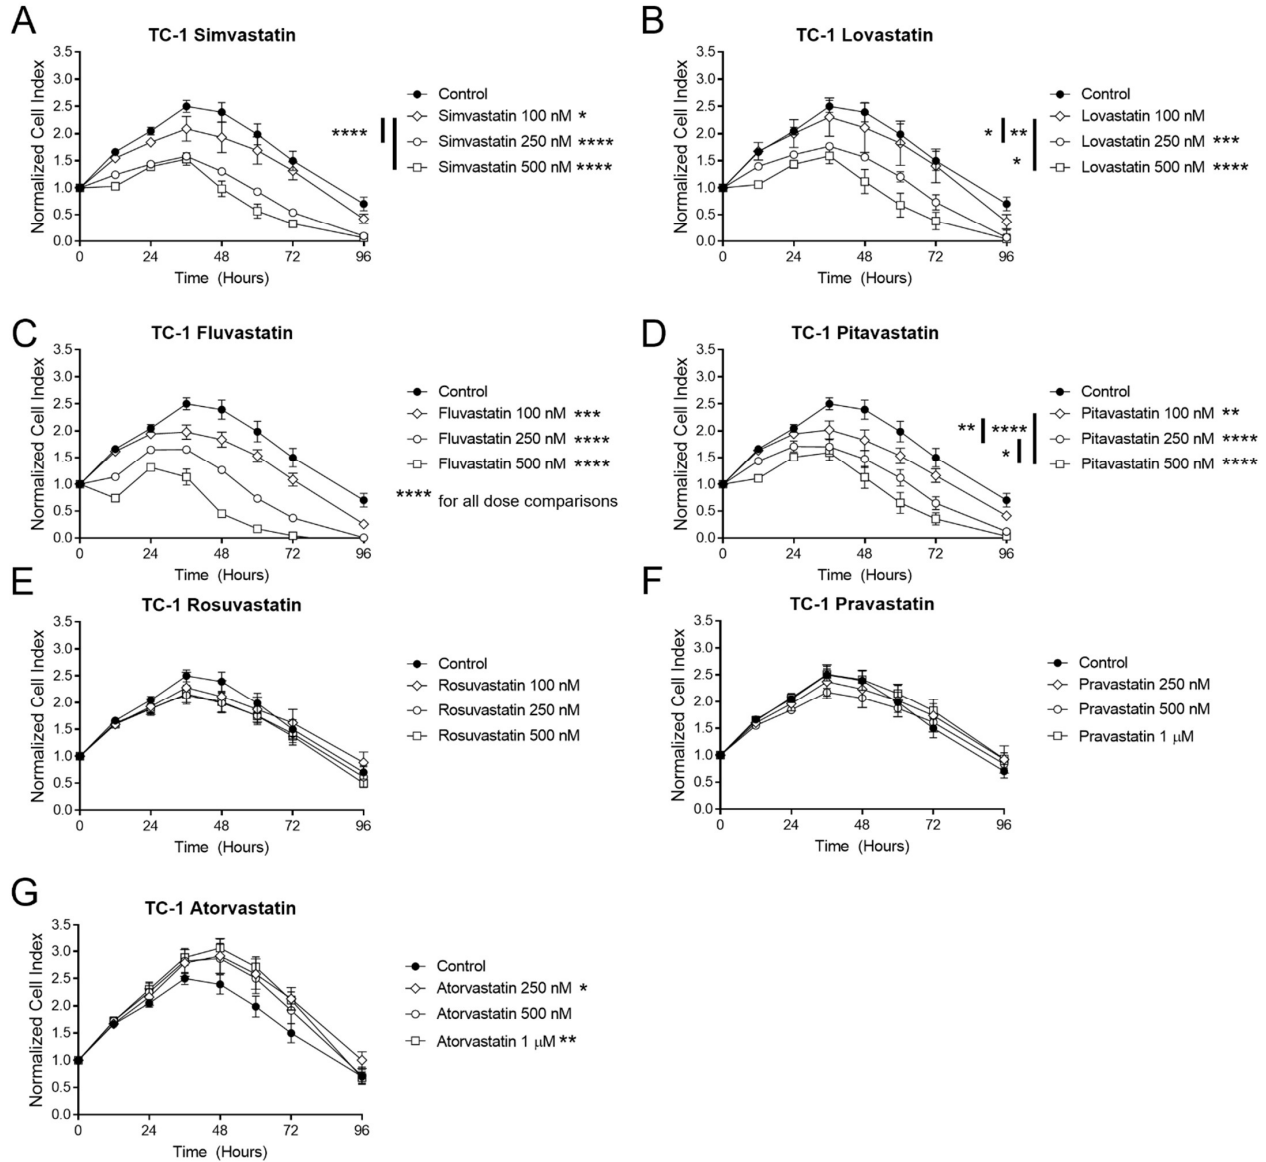

**Figure S2:** Different statins inhibit TC-1 tumor cell growth to variable degrees. TC-1 cells were plated in 96-well plates and allowed to adhere overnight. Some wells were then treated with statin drug for 96 hours. Data represent mean  $\pm$ SEM of 4 replicates, normalized to a cell index of 1.0 when statin was added (time 0 on graph). Graphs are representative of at least two independent experiments done in quadruplicate. \* $p < 0.05$ , \*\* $p < 0.01$ , \*\*\* $p < 0.001$ , \*\*\*\* $p < 0.0001$  versus control or as indicated. TIL, tumor infiltrating lymphocytes.

## Supplemental Figure S3

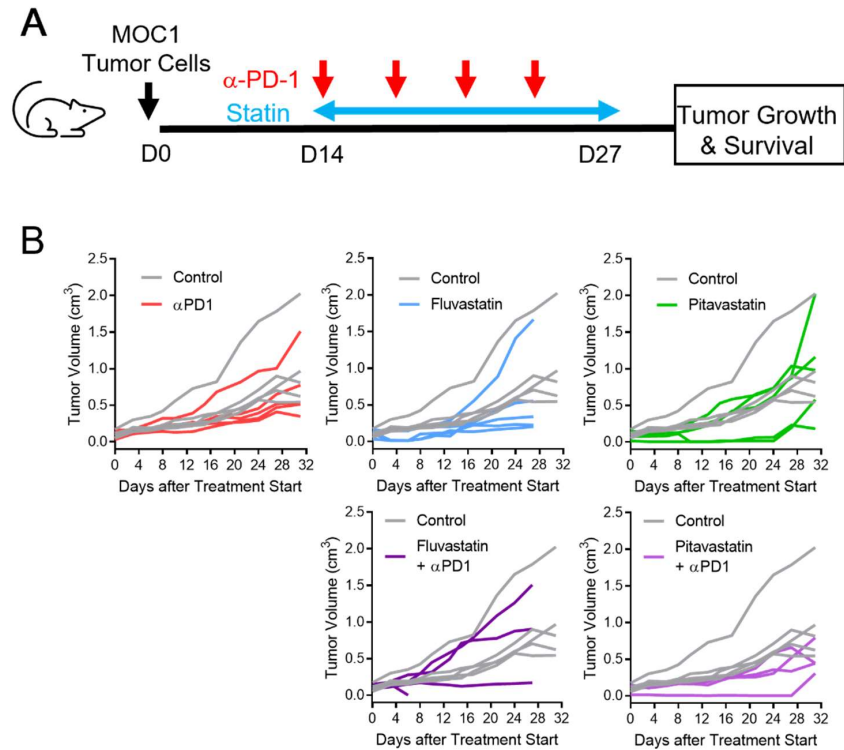

**Figure S3:** Fluvastatin and pitavastatin have anti-tumor activity *in vivo*. MOC1 cells were injected into the right flank, and animals were randomized on day 14 to treatment with fluvastatin (60 mg/kg/day by oral gavage), pitavastatin (3 mg/kg/day by oral gavage), anti-PD-1 (200 mcg IP twice/week) or statin + anti-PD-1. **A**, schema of experiment. **B**, Tumor growth curves showing individual animals, compared with control.

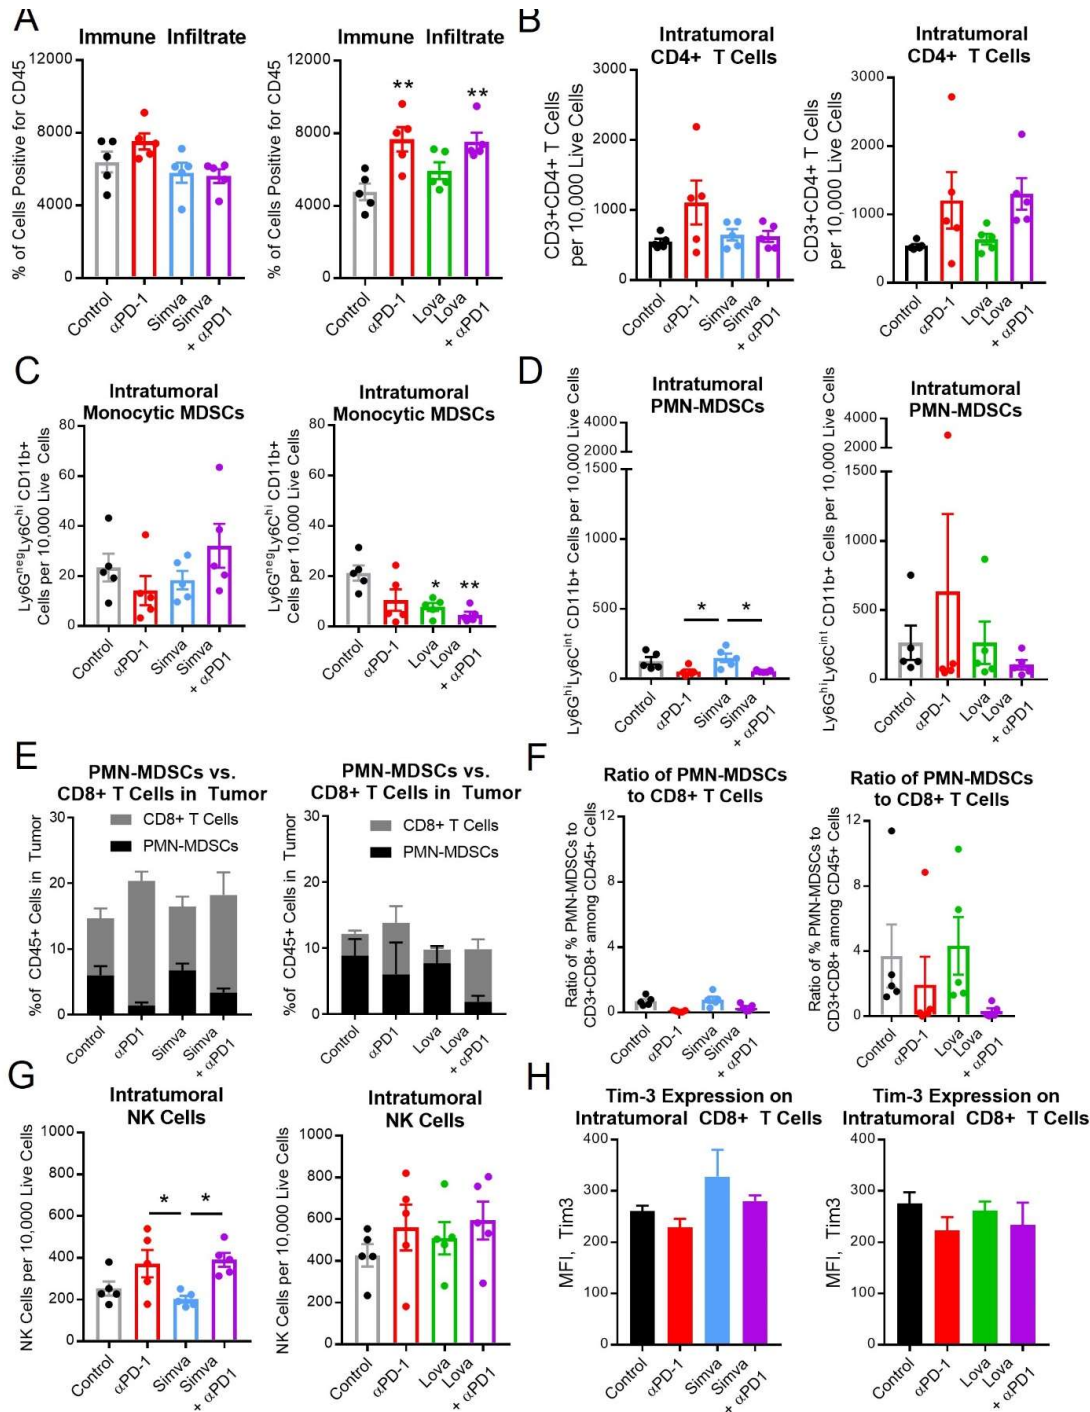

**Figure S4:** Simvastatin and lovastatin did not consistently alter the density of overall immune cells (A), CD4+ T cells (B), MDSCs (C-F), NK cells (G), or Tim3-expressing T cells (H). MOC1 tumor-bearing mice were treated with simvastatin/lovastatin and anti-PD-1 as in Figure 3. Mice were sacrificed during the second week of treatment, then tumors were harvested and analyzed by flow cytometry. D and E represent the relative percentages of PMN-MDSCs versus CD8+ T cells among live intratumoral CD45+ cells. Data are mean  $\pm$  SEM,  $n = 5$ , \*  $p < 0.05$ , \*\*  $p < 0.01$  (where indicated or versus control). MDSC, myeloid derived suppressor cell; NK, natural killer; PMN, polymorphonuclear.

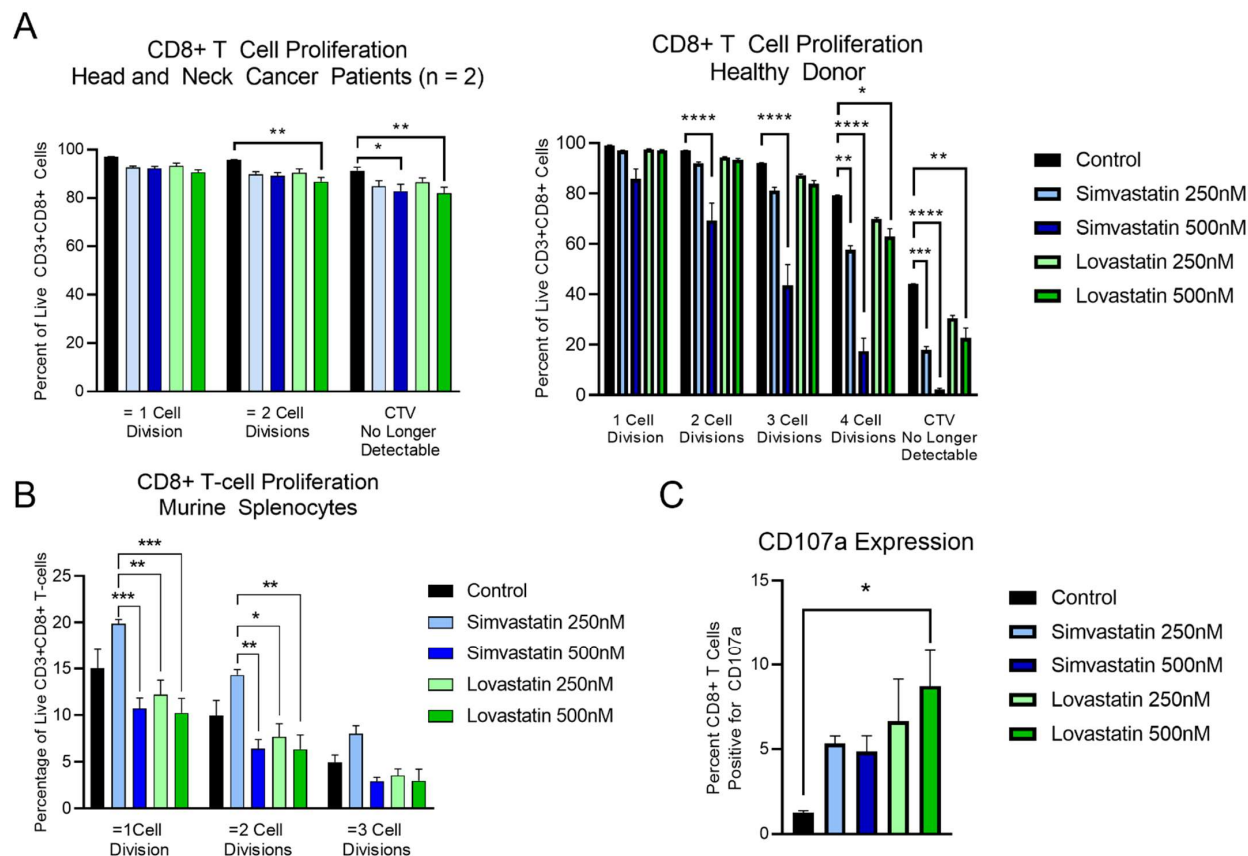

**Figure S5:** Statins may directly alter T cell function. **A**, T cells from the peripheral blood of two previously untreated head and neck cancer patients scheduled to undergo surgery (left) and a healthy donor (right) were stained with CellTrace Violet and stimulated with CD2/CD3/CD28 beads and IL-2 (50 IU/ml), with or without simvastatin or lovastatin, for 5 days (statin and IL-2 replenished on day 2). CellTrace Violet dilution was analyzed by flow cytometry. **B**, T cells sorted from mouse splenocytes were stained with CellTrace Violet and stimulated with IL-2 (50 IU/ml), with or without simvastatin or lovastatin, for 5 days (statin and IL-2 replenished on day 2). CellTrace Violet dilution was analyzed by flow cytometry. **C**, T cells from the same two head and neck cancer patients were treated as in **A**, then stained for surface CD107a and analyzed by flow cytometry. Data are mean + SEM from triplicate experiments. \*  $p < 0.05$ , \*\*  $p < 0.01$ , \*\*\*  $p < 0.001$ , \*\*\*\*  $p < 0.0001$ .



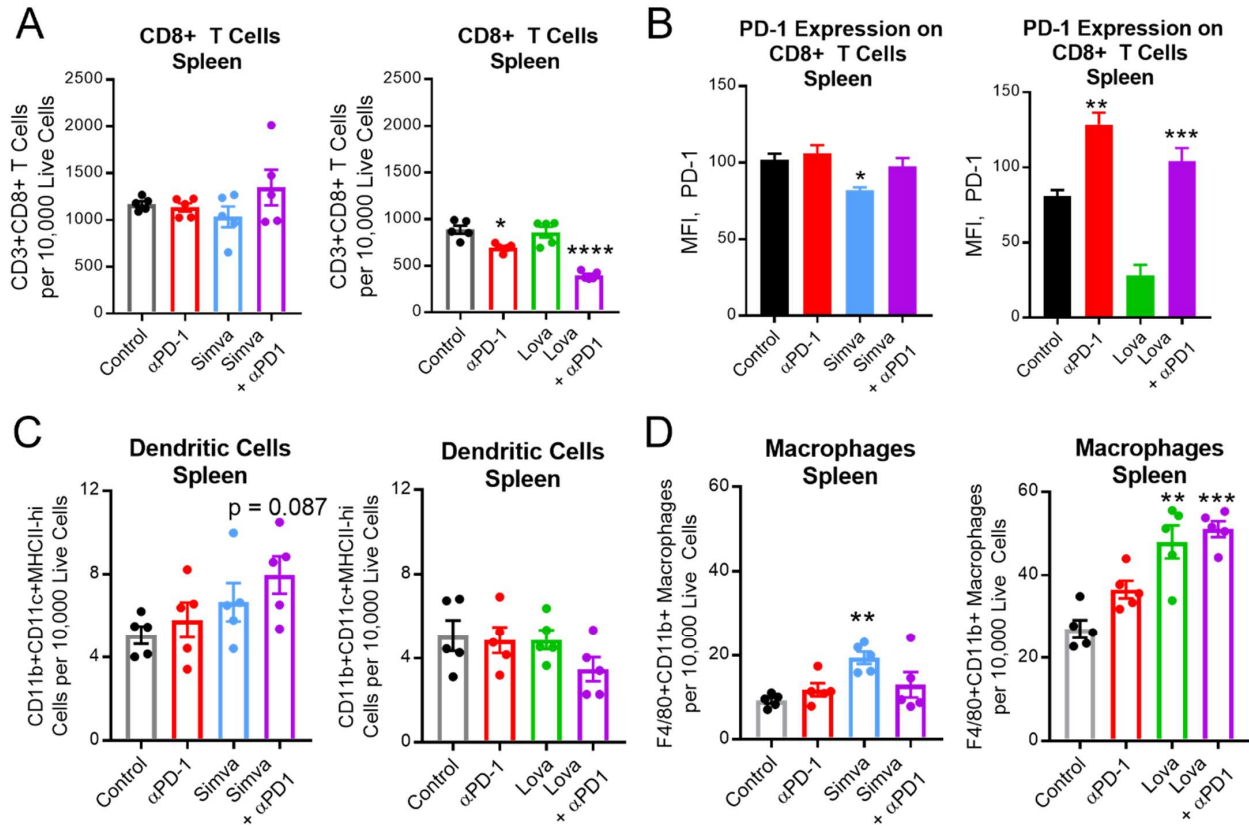

**Figure S6:** Statins did not have any consistent effect on immune cells in the spleen. MOC1 tumor-bearing mice were treated with simvastatin/lovastatin and anti-PD-1 as in Figure 3. Mice were sacrificed during the second week of treatment, then spleens were harvested and analyzed by flow cytometry. Data are mean  $\pm$  SEM,  $n = 5$ , \*\*  $p < 0.01$ , \*\*\*  $p < 0.001$  versus control.

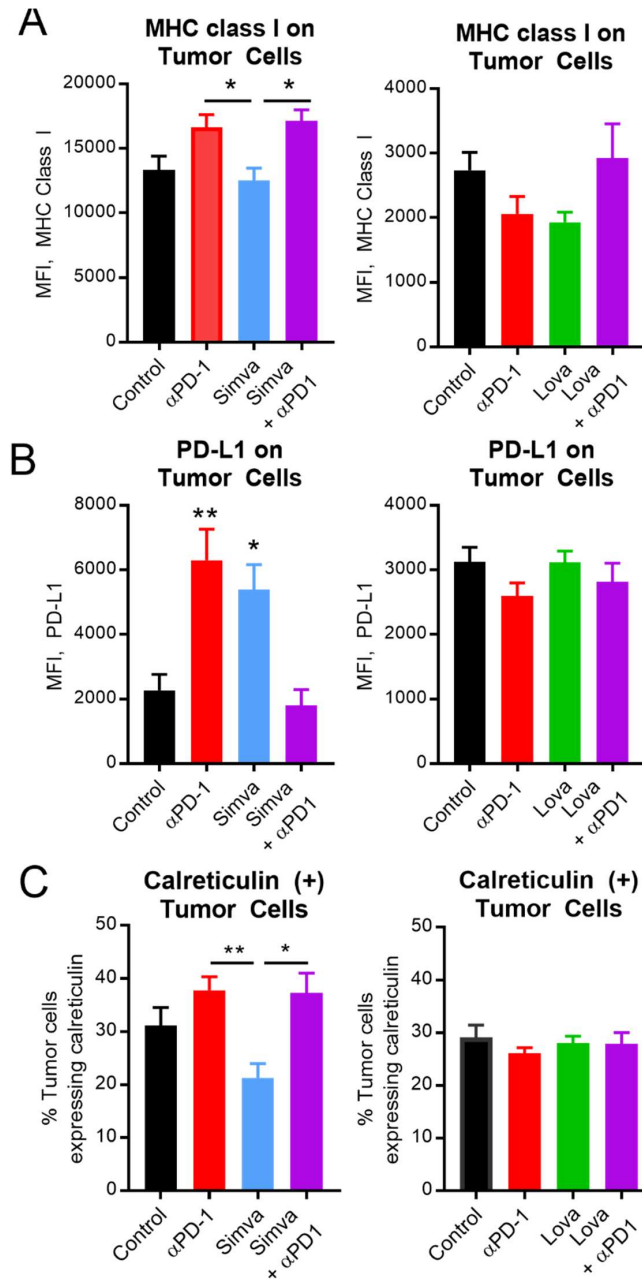

**Figure S7:** Statins did not have any consistent effect on MHC class I (A), PD-L1 (B), or calreticulin (C) surface expression on tumor cells. MOC1 tumor-bearing mice were treated with simvastatin/lovastatin and anti-PD-1 as in Figure 3. Mice were sacrificed during the second week of treatment, then tumors were harvested and analyzed by flow cytometry. Data are mean + SEM, n= 5, \* p <0.05, \*\*p <0.01 (where indicated or versus control).

**Supplemental Methods****Table S1:** Antibodies used for flow cytometry.

| <b>Antibody</b>           | <b>Vendor</b> | <b>Catalog#</b> |
|---------------------------|---------------|-----------------|
| Calreticulin              | Abcam         | Ab209577        |
| CellTrace Violet          | ThermoFisher  | C34571          |
| CD3                       | BD            | 563565          |
| CD3                       | BD            | 741352          |
| CD4                       | Biolegend     | 116020          |
| CD4                       | BD            | 612936          |
| CD8                       | Biolegend     | 100722          |
| CD8                       | BD            | 563795          |
| CD11b                     | Biolegend     | 101257          |
| CD11c                     | Biolegend     | 117336          |
| CD45                      | BD            | 566439          |
| CD80                      | Biolegend     | 104706          |
| CD107a                    | Biolegend     | 121614          |
| CD107a                    | Biolegend     | 328607          |
| CD206                     | Biolegend     | 141712          |
| EpCAM                     | Biolegend     | 118245          |
| F4/80                     | Biolegend     | 123112          |
| H-2Kb-H-2Db (MHC class I) | Biolegend     | 114612          |
| IFN- $\gamma$             | Miltenyi      | 130-117-668     |
| Ly6-C                     | Biolegend     | 128046          |
| Ly6-G                     | Biolegend     | 127608          |
| MHC class II (IA/IE)      | Biolegend     | 107632          |
| NK1.1                     | Biolegend     | 108714          |
| PD-L1                     | Biolegend     | 124312          |
| PD-1                      | Biolegend     | 135218          |
| Tim-3                     | Biolegend     | 119727          |
| Viability                 | BD            | 565694          |
| Viability                 | BD            | 565388          |
| ZUV (viability)           | Biolegend     | 423108          |
